# Supplementary material for: γ-Tubulin 2 Nucleates Microtubules and Is Downregulated in Mouse Early Embryogenesis
Source: PubMed Central journal article supplement (PMC3250491; doi:10.1371/journal.pone.0029919), 2012-01-03
Supplement: pone.0029919.s009.pdf [file pone.0029919.s009.pdf]

**Table S1**      **Alignments of human and mouse  $\gamma$ -tubulins**

**$\gamma$ -Tubulin 1**

```

H.s. MPREIITLQLGQCGNQIGFEFWKQLCAEHGISPEGIVEEFATEGTDRKDVFFYQADDEHYIPRAVLLDLEPRVIHSILNSPYAKLYNPENIYLSEHGGGAGNNWASGFSQGEKIHEDIFD 120
M.m. MPREIITLQLGQCGNQIGFEFWKQLCAEHGISPEGIVEEFATEGTDRKDVFFYQADDEHYIPRAVLLDLEPRVIHSILNSPYAKLYNPENIYLSEHGGGAGNNWASGFSQGEKIHEDIFD 120
*****

H.s. IIDREADGSDSLEGFVLCHSIAGGTGSGLGSYLLERLNDRYPKKLVTYTSVFPNQDEMSDVVVQPYNSLLTLKRLTQNADCVVLDNTALNRIATDRLHIQNPSFSQINQLVSTIMSAST 240
M.m. IIDREADGSDSLEGFVLCHSIAGGTGSGLGSYLLERLNDRYPKKLVTYTSVFPNQDEMSDVVVQPYNSLLTLKRLTQNADCVVLDNTALNRIATDRLHIQNPSFSQINQLVSTIMSAST 240
*****

H.s. TTLRYPGYMNNDLIGLIASLIPTPRLHFLMTGYTPLTTDQSVASVRKTTVLDVMRRLQLPKNVMVSTGRDRQTNHCYIAILNIIQGEVDPTQVHKSLQRIRERKLANFIPWGPASIQVAL 360
M.m. TTLRYPGYMNNDLIGLIASLIPTPRLHFLMTGYTPLTTDQSVASVRKTTVLDVMRRLQLPKNVMVSTGRDRQTNHCYIAILNIIQGEVDPTQVHKSLQRIRERKLANFIPWGPASIQVAL 360
*****

H.s. SRKSPYLPSAHRVSGLMANHTSISSLFERTCRQYDKLRKREAFLEQFRKEDMFKDNFDEMDTSREIVQQLIDEYHAATRDPDYISWGTQEQ 451
M.m. SRKSPYLPSAHRVSGLMANHTSISSLFERTCRQYDKLRKREAFMEQFRKEDIFKDNFDEMDTSREIVQQLIDEYHAATRDPDYISWGTQEQ 451
*****:*****:*****:*****

```

**$\gamma$ -Tubulin 2**

```

H.s. MPREIITLQLGQCGNQIGFEFWKQLCAEHGISPEGIVEEFATEGTDRKDVFFYQADDEHYIPRAVLLDLEPRVIHSILNSPYAKLYNPENIYLSEHGGGAGNNWASGFSQGEKIHEDIFD 120
M.m. MPREIITLQLGQCGNQIGFEFWKQLCAEHGISPEGIVEEFATEGTDRKDVFFYQADDEHYIPRAVLLDLEPRVIHSILNSPYAKLYNPENIYLSEHGGGAGNNWGRGFSQGEKIHEDIFD 120
*****

H.s. IIDREADGSDSLEGFVLCHSIAGGTGSGLGSYLLERLNDRYPKKLVTYTSVFPYQDEMSDVVVQPYNSLLTLKRLTQNADCVVLDNTALNRIATDRLHIQNPSFSQINQLVSTIMSAST 240
M.m. IIDREADGSDSLEGFVLCHSIAGGTGSGLGSYLLERLNDRYPKKLVTYTSVFPNQDEMSDVVVQPYNSLLTLKRLTQNADCVVLDNTALNRIATDRLHIQNPSFSQINQLVSTIMSAST 240
*****

H.s. TTLRYPGYMNNDLIGLIASLIPTPRLHFLMTGYTPLTTDQSVASVRKTTVLDVMRRLQLPKNVMVSTGRDRQTNHCYIAILNIIQGEVDPTQVHKSLQRIRERKLANFIPWGPASIQVAL 360
M.m. TTLRYPGYMNNDLIGLIASLIPTPRLHFLMTGYTPLTTDQSVASVRKTTVLDVMRRLQLPKNVMVSTGRDRQTNHCYIAILNIIQGEVDPTQVHKSLQRIRERKLANFIPWGPASIQVAL 360
*****

H.s. SRKSPYLPSAHRVSGLMANHTSISSLFESSCQQYDKLRKRDFAFLEQFRKEDMFKDNFDEMDRSREVVQELIDEYHAATQPDYISWGTQEQ 451
M.m. SRKSPYLPSAHRVSGLMANHTSISSLFESSCQQYDKLWKRGAFLQFRKEDIFKDNFDEMDRSREVVQELIDEYHAATRDPDYISWGTQEQ 451
*****:*** ** .*****:*****:*.*****:*****

```

*H.s.*, human (*Homo sapiens*); *M. m.*, mouse (*Mus musculus*). Accessions numbers (NCBI database): human  $\gamma$ -tubulin 1, NP\_001061.2; mouse  $\gamma$ -tubulin 1, NP\_598785.1; human  $\gamma$ -tubulin 2, NP\_057521.1; mouse  $\gamma$ -tubulin 2, NP\_598789.1. An asterisk indicates positions which have a single, fully conserved residue. A colon indicates conservation among groups of strongly similar properties. A period indicates conservation among groups of weakly similar properties. Different amino acids are highlighted.
