# Supplementary material for: γ-Tubulin 2 Nucleates Microtubules and Is Downregulated in Mouse Early Embryogenesis
Source: PubMed Central journal article supplement (PMC3250491; doi:10.1371/journal.pone.0029919), 2012-01-03
Supplement: pone.0029919.s010.pdf [file pone.0029919.s010.pdf]

**Table S2. Multiple sequence alignment of carboxy-terminal domains of mammalian  $\gamma$ -tubulins**

| Species                               | Part of helix H11  | Part of helix H12      | Accession number             |
|---------------------------------------|--------------------|------------------------|------------------------------|
| <b><math>\gamma</math>-tubulin 2</b>  |                    |                        |                              |
| Human ( <i>Homo sapiens</i> )         | (386) SLFESSCQQFDK | (419) DEMDRSREVVQELIDE | NP_057521.1                  |
| Chimpanzee ( <i>Pan troglodytes</i> ) | (386) SLFESSCQQFDK | (419) DEMDRSREVVQELIDE | XP_003315538                 |
| Mouse ( <i>Mus musculus</i> )         | (386) SLFESSCQQYDK | (419) EEMHRSREVVQELIDE | NP_598789.1                  |
| Rat ( <i>Rattus norvegicus</i> )      | (411) SLFESSCQQYDK | (444) EEMDRSREVVQELIDE | NP_001178004.1               |
| Horse ( <i>Equus caballus</i> )       | (386) SLFESSCQQYDK | (419) DELDRSREVVQELIDE | XP_001493749.1               |
| Bat ( <i>Myotis lucifugus</i> )       | (386) SLFESSCQQYDK | (419) DELDRSREVVQELIDE | ENSMLUP00000007140 (Ensembl) |
| Bovine ( <i>Bos taurus</i> )          | (386) SLFESSCQQYDK | (419) DELDRSREVVQELIDE | NP_001032704.1               |
| Dog ( <i>Canis familiaris</i> )       | (386) SLFESSCQQYDK | (419) DELDTSREVVQELIDE | XP_548085.2                  |
| <b><math>\gamma</math>-tubulin 1</b>  |                    |                        |                              |
| Human ( <i>Homo sapiens</i> )         | (386) SLFERTCRQYDK | (419) DEMDTSREIVQQLIDE | NP_001061.2                  |
| Chimpanzee ( <i>Pan troglodytes</i> ) | (386) SLFERTCRQYDK | (419) DEMDTSREIVQQLIDE | XP_001162243                 |
| Mouse ( <i>Mus musculus</i> )         | (386) SLFERTCRQFDK | (419) DEMDTSREIVQQLIDE | NP_598785.1                  |
| Rat ( <i>Rattus norvegicus</i> )      | (386) SLFERTCRQFDK | (419) DEMDTSREIVQQLIDE | NP_665721.1                  |
| Horse ( <i>Equus caballus</i> )       | (386) SLFERTCRQYDK | (419) DELDTSREIVQQLIDE | XP_001493897.2               |
| Bat ( <i>Myotis lucifugus</i> )       | (386) SLFERTCRQYDK | (419) DELDTSREIVQQLIDE | ENSMLUP00000015217 (Ensembl) |
| Bovine ( <i>Bos taurus</i> )          | (386) SLFERTCRQYDK | (419) DELDTSREIVQQLIDE | NP_001069723.1               |
| Dog ( <i>Canis familiaris</i> )       | (386) SLFERTCRQYDK | (419) DELDTSREVVHQLIDE | NP_001003105.1               |
|                                       | **** :*:*:**       | :*:. ****:*:*:**       |                              |

Protein sequences of indicated mammalian  $\gamma$ -tubulins were aligned by online version of ClustalW2 ([www.ebi.ac.uk/Tools/msa/clustalw2](http://www.ebi.ac.uk/Tools/msa/clustalw2)) using default parameters. Only clusters of conserved amino acids located on helix H11 and helix H12 of  $\gamma$ -tubulin are shown. Numbers in brackets indicate the position of the first amino acid in the whole polypeptide chain. Accession numbers to NCBI or Ensembl databases are provided. An asterisk indicates positions which have one single, fully conserved residue. A colon indicates conservation among groups of strongly similar properties. A period indicates conservation among groups of weakly similar properties. Conserved  $\gamma$ -tubulin 2-specific amino acids are highlighted.
