# Supplementary material for: γ-Tubulin 2 Nucleates Microtubules and Is Downregulated in Mouse Early Embryogenesis
Source: PubMed Central journal article supplement (PMC3250491; doi:10.1371/journal.pone.0029919), 2012-01-03
Supplement: pone.0029919.s011.pdf [file pone.0029919.s011.pdf]

**Table S3. Sequences of primers used for RT-qPCR analysis of mouse genes**

| Name                 | Sequence                       | Amplicon length |
|----------------------|--------------------------------|-----------------|
| <i>Tubg1</i> , fwd   | 5'-GCCACACGGCCAGACTATAT-3'     | 131 bp          |
| <i>Tubg1</i> , rev   | 5'-TCCCTGATCTGTGCTCCGAG-3'     |                 |
| <i>Tubg2</i> , fwd   | 5'-GAGGAGATGCACAGATCGAGG-3'    | 140 bp          |
| <i>Tubg2</i> , rev   | 5'-GGACTGTGCTTCTTGTCCAGG-3'    |                 |
| <i>Tubgcp2</i> , fwd | 5'-CGGGCTTGAGCTCAGACACAGTTT-3' | 220 bp          |
| <i>Tubgcp2</i> , rev | 5'-GGCGGCCACAGGGAGGATTC-3'     |                 |
| <i>Tubgcp5</i> , fwd | 5'-TGTCGTCCGGGCATCTCACCT-3'    | 185 bp          |
| <i>Tubgcp5</i> , rev | 5'-TCCCTTGCGCCGTCCCATAG-3'     |                 |
| <i>Ppia</i> , fwd    | 5'-CGCGTCTCCTTCGAGCTGTTTG-3'   | 150 bp          |
| <i>Ppia</i> , rev    | 5'-TGTAAGTCACCACCCTGGCACAT-3'  |                 |
| <i>Gadph</i> , fwd   | 5'-AACTTTGGCATTGTGGAAGG-3'     | 68 bp           |
| <i>Gapdh</i> , rev   | 5'-ATCCACAGTCTTCTGGGTGG-3'     |                 |
